# Supplementary material
Source: PubMed Central journal article supplement (PMC2673703)

IgG

IP: IRS1

IB: P-Tyr

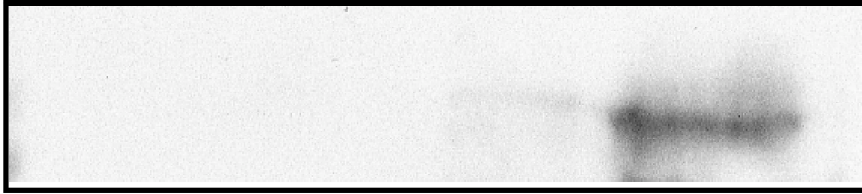

Supplement: NIHMS67262-supplement-SF_1.pdf [file NIHMS67262-supplement-SF_1.pdf]

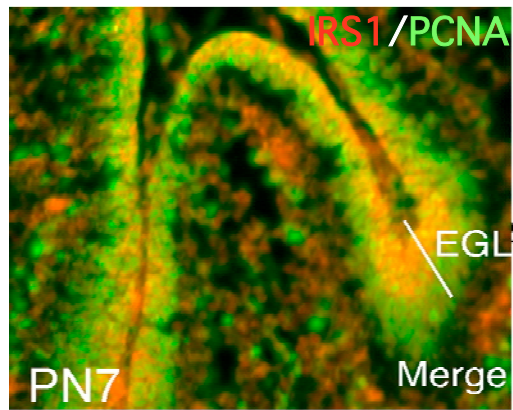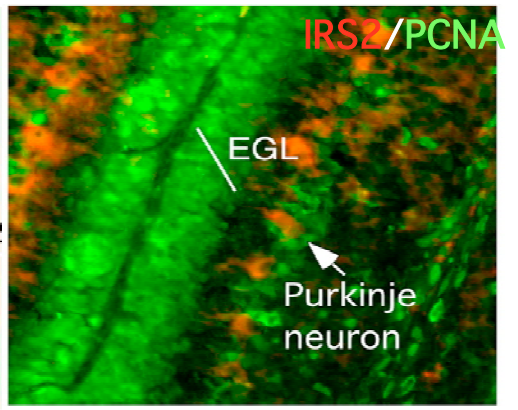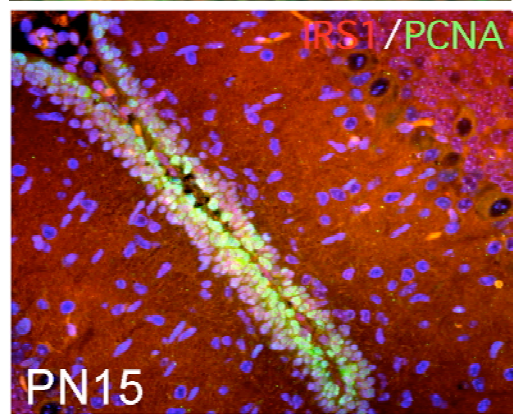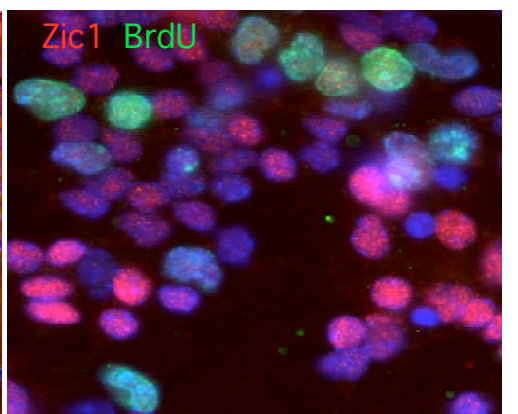

Supplement: NIHMS67262-supplement-SF_2.pdf [file NIHMS67262-supplement-SF_2.pdf]

**Gli1**

**IRS-1/Dapi**

**Wild-type**

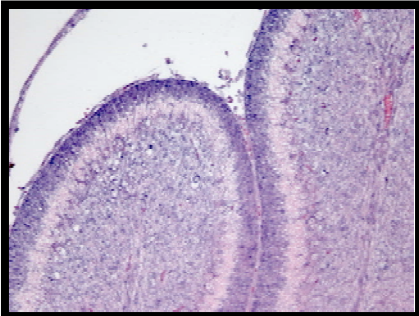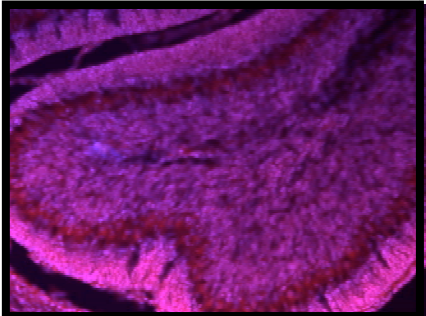

**IRS-2<sup>-/-</sup>**

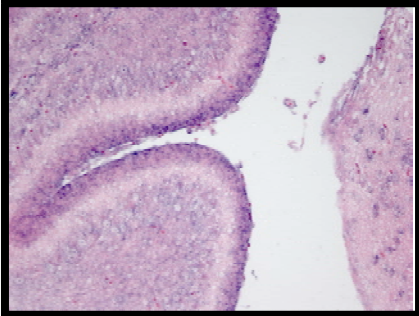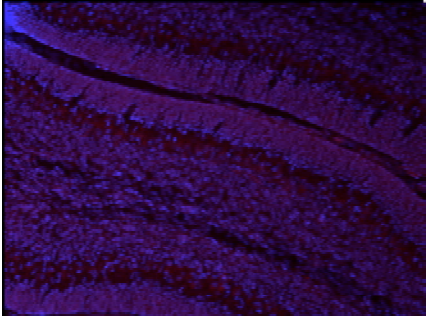

Supplement: NIHMS67262-supplement-SF_3.pdf [file NIHMS67262-supplement-SF_3.pdf]

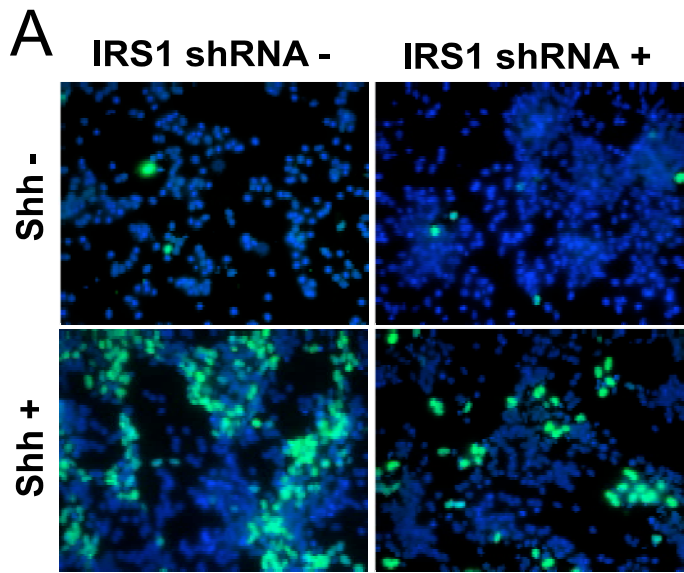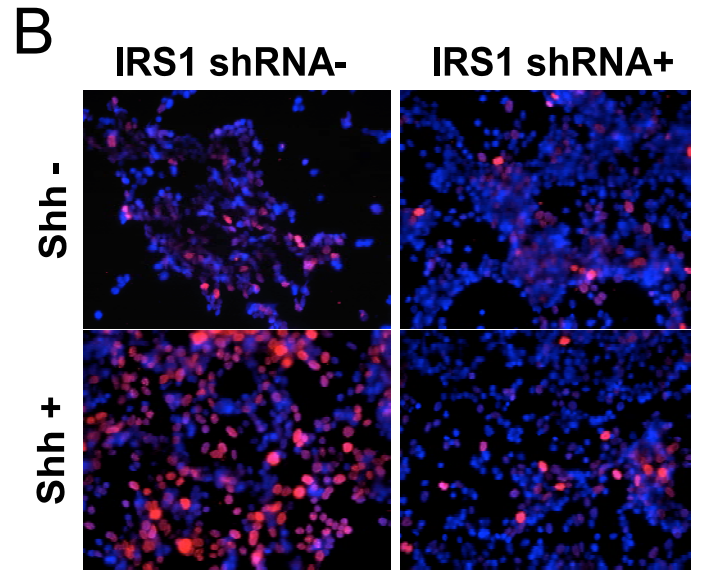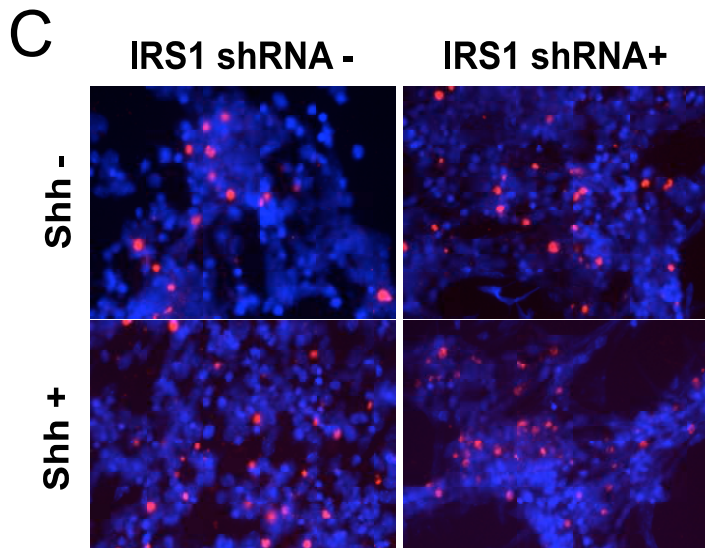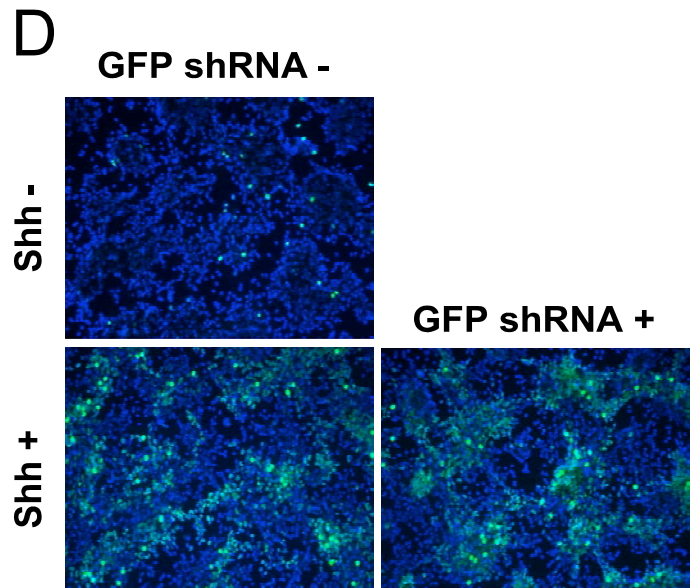

Supplement: NIHMS67262-supplement-SF_4.pdf [file NIHMS67262-supplement-SF_4.pdf]

**A**

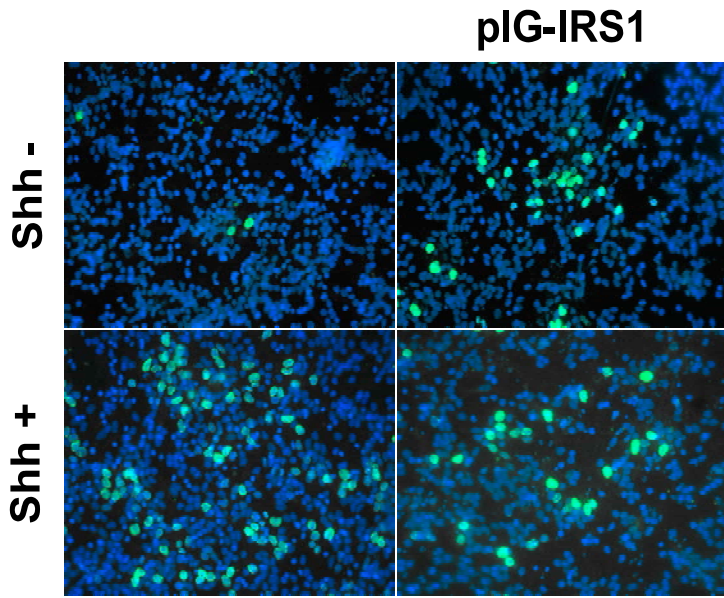

**B**

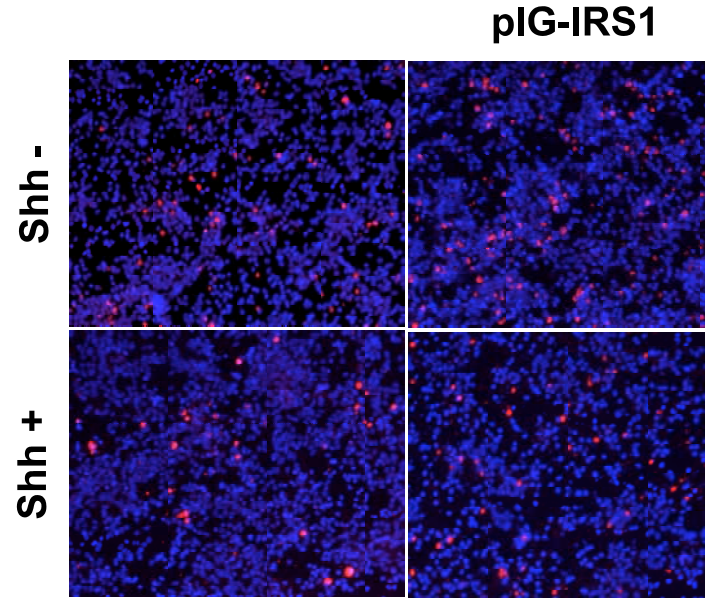

Supplement: NIHMS67262-supplement-SF_5.pdf [file NIHMS67262-supplement-SF_5.pdf]
